# Supplementary material for: Direct inversion of circulation and mixing from tracer measurements – Part 1: Method
Source: Copernicus journal article supplement (doi:10.5194/acp-16-14563-2016), 2016-11-23
Supplement: Supplementary file 1 [file acp-16-14563-2016-supplement.zip]

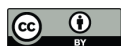

## *Supplement of*

# **Direct inversion of circulation and mixing from tracer measurements – Part 1: Method**

**Thomas von Clarmann and Udo Grabowski**

*Correspondence to:* Thomas von Clarmann (thomas.clarmann@kit.edu)

- [acp-16-14563-2016-supplement-title-page.pdf](#)
- [Supplement1.pdf](#)
- [Supplement2.tar](#)

The copyright of individual parts of the supplement might differ from the CC-BY 3.0 licence.
